# Supplementary material for: Rare and Common Genetic Variants, Smoking, and Body Mass Index: Progression and Earlier Age of Developing Advanced Age-Related Macular Degeneration
Source: PubMed Central journal article supplement — Invest Ophthalmol Vis Sci. 2020 Dec 28;61(14):32. doi: 10.1167/iovs.61.14.32 (PMC7774056; doi:10.1167/iovs.61.14.32), 2020-12-28
Supplement: iovs-61-14-32_s001.pdf [file iovs-61-14-32_s001.pdf]

**Supplementary Figure S1.** Visualization of how an eye progressed to overall advanced age-related macular degeneration (AMD) using confirmation at 2 consecutive visits. The examples below are right eye only and taken directly from AREDS data. Some examples include eyes that i) did not progress to advanced AMD (eyes 1-4), ii) eyes with unconfirmed progression due to flip-flopping scales between advanced scales of 9-12 and non-advanced scales (eyes 5-7), and iii) eyes with confirmed progression based on having 2 consecutive visits with scale 9-12 (eyes 8-13). The circle icon is the visit where the eye was graded with advanced AMD but never confirmed. The white square is the visit where the eye was first graded with a severity scale indicating advanced AMD. The red square is the visit where the progression was confirmed based on having an advanced severity scale at 2 consecutive visits for progression to advanced AMD. In our analyses, eyes with unconfirmed and no progression were combined as the reference (REF) group, and compared to eyes with confirmed progression.

| Example eye | Year of Study Visit |     |     |     |     |     |     |     |     |     |     |     |     | Progression Status |     |     |     |     |     |     |      |      |      |      |      |                            |                |
|-------------|---------------------|-----|-----|-----|-----|-----|-----|-----|-----|-----|-----|-----|-----|--------------------|-----|-----|-----|-----|-----|-----|------|------|------|------|------|----------------------------|----------------|
|             | 0.0                 | 0.5 | 1.0 | 1.5 | 2.0 | 2.5 | 3.0 | 3.5 | 4.0 | 4.5 | 5.0 | 5.5 | 6.0 | 6.5                | 7.0 | 7.5 | 8.0 | 8.5 | 9.0 | 9.5 | 10.0 | 10.5 | 11.0 | 11.5 | 12.0 | Progressed to advanced AMD | Follow up time |
| 1           | 4                   |     |     |     | 5   | 5   |     | 5   |     | 8   | 6   |     | 8   | 8                  |     | 8   | 8   |     | 8   | 8   |      |      |      |      |      | NO                         |                |
| 2           | 2                   |     |     |     | 2   | 4   |     | 4   |     | 5   | 4   |     | 2   | 4                  |     | 5   | 4   |     |     |     |      |      |      |      |      | NO                         |                |
| 3           | 6                   |     |     |     | 5   | 7   |     | 6   |     | 4   | 3   |     | 5   | 6                  |     | 8   | 4   |     |     |     |      |      | 8    |      |      | NO                         |                |
| 4           | 5                   | 7   |     |     | 6   | 7   |     | 2   |     | 7   | 4   |     | 6   | 8                  |     | 3   | 4   |     |     |     |      | 4    |      | 8    |      | NO                         |                |
| 5           | 4                   |     |     |     | 11  |     |     | 4   |     | 4   | 1   |     | 2   | 1                  | 4   |     |     |     |     |     |      |      |      |      |      | NO                         |                |
| 6           | 2                   |     |     |     | 2   | 9   |     | 4   |     | 4   |     |     |     |                    |     |     |     |     |     |     |      |      |      |      |      | NO                         |                |
| 7           | 4                   |     |     |     | 11  | 3   |     | 3   |     | 5   | 3   |     | 4   | 4                  |     | 4   | 4   |     |     |     |      | 4    |      | 6    |      | NO                         |                |
| 8           | 7                   |     |     |     | 11  | 6   |     | 8   |     | 9   | 8   |     | 8   |                    |     | 9   | 9   |     |     |     |      | 9    |      | 9    |      | YES                        | 10             |
| 9           | 7                   |     |     |     | 11  | 5   |     | 8   |     | 11  | 11  |     | 8   | 8                  |     | 11  | 11  |     |     |     |      | 11   |      | 11   |      | YES                        | 5              |
| 10          | 6                   |     |     |     | 5   | 9   |     | 5   |     | 9   |     |     | 10  | 10                 |     | 10  | 10  |     |     |     |      | 10   |      | 10   |      | YES                        | 7              |
| 11          | 6                   | 7   |     |     | 8   | 11  |     | 7   |     | 6   |     | 8   | 11  | 11                 |     | 11  | 11  |     |     |     |      | 8    |      |      |      | YES                        | 8              |
| 12          | 7                   |     |     |     | 9   | 8   |     | 10  |     | 10  | 10  |     | 10  | 10                 |     | 10  | 10  |     |     |     |      | 10   |      | 10   |      | YES                        | 5              |
| 13          | 7                   | 12  |     |     | 10  | 12  |     | 12  |     | 12  | 10  |     | 12  | 12                 |     | 12  | 12  |     |     |     |      | 12   |      | 12   |      | YES                        | 2              |
