# Supplementary material for: Rare and Common Genetic Variants, Smoking, and Body Mass Index: Progression and Earlier Age of Developing Advanced Age-Related Macular Degeneration
Source: PubMed Central journal article supplement — Invest Ophthalmol Vis Sci. 2020 Dec 28;61(14):32. doi: 10.1167/iovs.61.14.32 (PMC7774056; doi:10.1167/iovs.61.14.32), 2020-12-28

**Supplementary Figure S3.** Boxplot of age of progression to advanced macular degeneration according to smoking and BMI status.

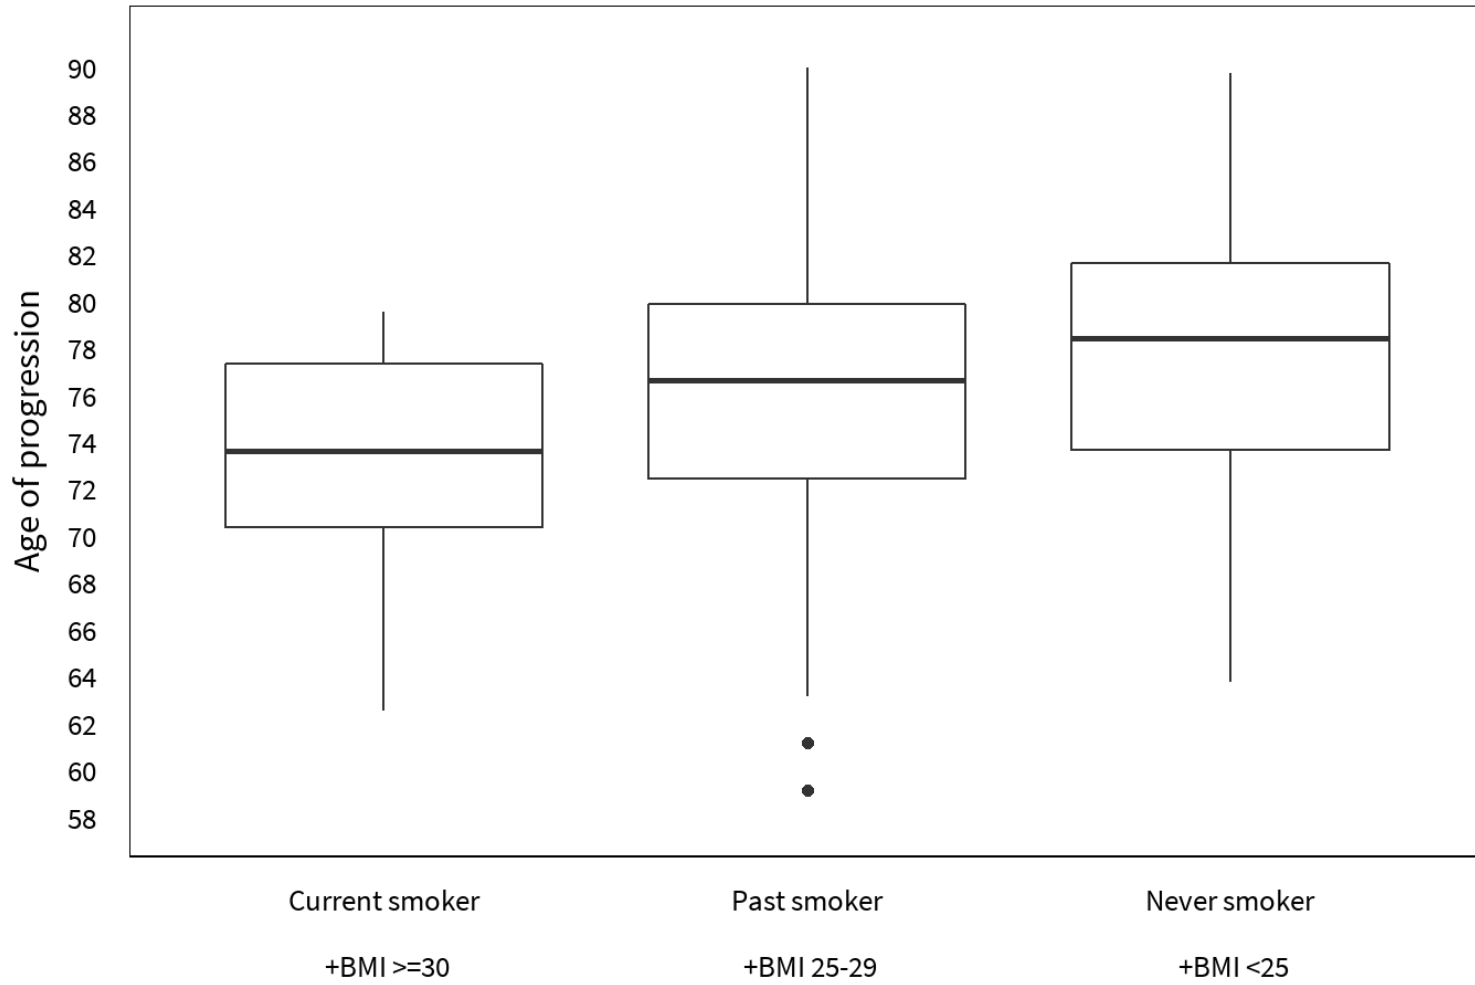

Supplement: iovs-61-14-32_s003.pdf [file iovs-61-14-32_s003.pdf]
