# Supplementary material for: Rare and Common Genetic Variants, Smoking, and Body Mass Index: Progression and Earlier Age of Developing Advanced Age-Related Macular Degeneration
Source: PubMed Central journal article supplement — Invest Ophthalmol Vis Sci. 2020 Dec 28;61(14):32. doi: 10.1167/iovs.61.14.32 (PMC7774056; doi:10.1167/iovs.61.14.32), 2020-12-28
Supplement: iovs-61-14-32_s004.pdf [file iovs-61-14-32_s004.pdf]

**Supplementary Table S1.** Distribution of baseline characteristics for study population

|                                              | <b>N or mean<br/>(<math>\pm</math>SD)</b> | <b>%</b> |
|----------------------------------------------|-------------------------------------------|----------|
| <b>Number of progressors</b>                 |                                           |          |
| Subjects                                     | 616/2941                                  |          |
| Eyes                                         | 948/5421                                  | 17.5     |
| <b>Follow up time (years)</b>                |                                           |          |
| Eyes that progressed                         | 6.4 ( $\pm$ 3.0)                          |          |
| All eyes                                     | 9.6 ( $\pm$ 2.4)                          |          |
| <b>Age at baseline</b>                       |                                           |          |
|                                              | 68.8 ( $\pm$ 5.0)                         |          |
| <65                                          | 555                                       | 18.9     |
| 65- <75                                      | 1916                                      | 65.2     |
| 75+                                          | 470                                       | 16.0     |
| <b>Demographic</b>                           |                                           |          |
| male                                         | 1291                                      | 43.9     |
| white                                        | 2835                                      | 96.4     |
| > high school                                | 1950                                      | 66.3     |
| <b>Behavioral</b>                            |                                           |          |
| <b>Smoking status</b>                        |                                           |          |
| Never smoker                                 | 1385                                      | 47.1     |
| Current smoker                               | 180                                       | 6.1      |
| Past smoker                                  | 1376                                      | 46.8     |
| <b>BMI category</b>                          |                                           |          |
| BMI <25                                      | 963                                       | 32.7     |
| BMI 25-29                                    | 1248                                      | 42.4     |
| BMI $\geq$ 30                                | 730                                       | 24.8     |
| <b>Baseline Severity Scale<br/>(per eye)</b> |                                           |          |
| 1                                            | 2304                                      | 42.5     |
| 2                                            | 748                                       | 13.8     |
| 3                                            | 307                                       | 5.7      |
| 4                                            | 577                                       | 10.6     |
| 5                                            | 361                                       | 6.7      |
| 6                                            | 463                                       | 8.5      |
| 7                                            | 479                                       | 8.8      |
| 8                                            | 182                                       | 3.4      |
| <b>Genetic variants</b>                      |                                           |          |
| <b>Complement pathway</b>                    |                                           |          |
| <i>CFH</i> Y402H: rs1061170                  |                                           |          |
| TT                                           | 891                                       | 30.3     |
| CT                                           | 1345                                      | 45.7     |

|                                |      |      |
|--------------------------------|------|------|
| CC                             | 705  | 24.0 |
| <i>CFH</i> : rs1410996         |      |      |
| TT                             | 382  | 13.0 |
| CT                             | 1199 | 40.8 |
| CC                             | 1360 | 46.2 |
| <i>CFH</i> R1210C: rs121913059 |      |      |
| CC                             | 2928 | 99.6 |
| CT                             | 13   | 0.4  |
| <i>C2</i> E318D: rs9332739     |      |      |
| GG                             | 2738 | 93.1 |
| CG/CC                          | 203  | 6.9  |
| <i>CFB</i> R32Q: rs641153      |      |      |
| CC                             | 2530 | 86.0 |
| TC/TT                          | 411  | 14.0 |
| <i>CFI</i> : rs10033900        |      |      |
| CC                             | 754  | 25.6 |
| CT                             | 1437 | 48.9 |
| TT                             | 750  | 25.5 |
| <i>C3</i> R102G: rs2230199     |      |      |
| CC                             | 1713 | 58.3 |
| CG                             | 1066 | 36.3 |
| GG                             | 162  | 5.5  |
| <i>C3</i> K155Q: rs147859257   |      |      |
| TT                             | 2882 | 98.0 |
| GT                             | 59   | 2.0  |
| <i>C9</i> P167S: rs34882957    |      |      |
| GG                             | 2874 | 97.7 |
| AG                             | 67   | 2.3  |
| <i>CFH</i> N1050Y: rs35274867  |      |      |
| AA                             | 2872 | 97.7 |
| TA                             | 66   | 2.2  |
| TT                             | 3    | 0.1  |
| <b>Angiogenesis pathway</b>    |      |      |
| <i>VEGFA</i> : rs943050        |      |      |
| CC                             | 639  | 21.7 |
| CT                             | 1492 | 50.7 |
| TT                             | 810  | 27.5 |
| <i>TGFBR1</i> : rs334353       |      |      |
| TT                             | 1715 | 58.3 |
| GT                             | 1048 | 35.6 |
| GG                             | 178  | 6.1  |
| <b>Lipid pathway</b>           |      |      |
| <i>LIPC</i> : rs10468017       |      |      |

|                                    |      |      |
|------------------------------------|------|------|
| CC                                 | 1548 | 52.6 |
| TC                                 | 1183 | 40.2 |
| TT                                 | 210  | 7.1  |
| <i>ABCA1: rs1883025</i>            |      |      |
| CC                                 | 1633 | 55.5 |
| TC                                 | 1131 | 38.5 |
| TT                                 | 177  | 6.0  |
| <i>CETP: rs3764261</i>             |      |      |
| CC                                 | 1273 | 43.3 |
| AC                                 | 1332 | 45.3 |
| AA                                 | 336  | 11.4 |
| <i>APOC1/APOE: rs4420638</i>       |      |      |
| AA                                 | 2104 | 71.5 |
| GA                                 | 837  | 28.5 |
| <i>APOH: rs1801689</i>             |      |      |
| AA                                 | 2756 | 93.7 |
| AC                                 | 184  | 6.3  |
| CC                                 | 1    | 0.0  |
| <b>Immune/inflammatory pathway</b> |      |      |
| <i>ARMS2/HTRA1: rs10490924</i>     |      |      |
| GG                                 | 1487 | 50.6 |
| TG                                 | 1141 | 38.8 |
| TT                                 | 313  | 10.6 |
| <i>PEL13: rs145732233</i>          |      |      |
| CC                                 | 2918 | 99.2 |
| TC                                 | 23   | 0.8  |
| <i>TNFRSF10A: rs13278062</i>       |      |      |
| TT                                 | 821  | 27.9 |
| GT                                 | 1474 | 50.1 |
| GG                                 | 646  | 22.0 |
| <i>SLC16A8: rs8135665</i>          |      |      |
| CC                                 | 1862 | 63.3 |
| TC                                 | 950  | 32.3 |
| TT                                 | 129  | 4.4  |
| <i>PILRB/PILRA: rs11769700</i>     |      |      |
| TT                                 | 1849 | 62.9 |
| CT                                 | 975  | 33.2 |
| CC                                 | 117  | 4.0  |
| <i>TMEM97/VTN: rs704</i>           |      |      |
| AA                                 | 693  | 23.6 |
| AG                                 | 1456 | 49.5 |
| GG                                 | 792  | 26.9 |

**Extracellular matrix**

|                                   |      |      |
|-----------------------------------|------|------|
| <i>COL8A1: rs13095226</i>         |      |      |
| TT                                | 2358 | 80.2 |
| CT                                | 548  | 18.6 |
| CC                                | 35   | 1.2  |
| <i>COL4A3: rs11884770</i>         |      |      |
| CC                                | 1558 | 53.0 |
| TC                                | 1159 | 39.4 |
| TT                                | 224  | 7.6  |
| <i>CTRB1: rs8056814</i>           |      |      |
| GG                                | 2440 | 83.0 |
| AG                                | 473  | 16.1 |
| AA                                | 28   | 1.0  |
| <i>ADAMTS9: rs6795735</i>         |      |      |
| CC                                | 881  | 30.0 |
| TC                                | 1421 | 48.3 |
| TT                                | 639  | 21.7 |
| <i>TIMP3: rs9621532</i>           |      |      |
| AA                                | 2653 | 90.2 |
| CA/CC                             | 288  | 9.8  |
| <b>DNA repair/protein binding</b> |      |      |
| <i>RAD51B: rs8017304</i>          |      |      |
| AA                                | 1210 | 41.1 |
| GA                                | 1349 | 45.9 |
| GG                                | 382  | 13.0 |
| <i>NPLOC4/TSPAN10:</i>            |      |      |
| rs9895741                         |      |      |
| GG                                | 1226 | 41.7 |
| AG                                | 1311 | 44.6 |
| AA                                | 404  | 13.7 |
| <i>HSPH1/B3GALTL: rs9542236</i>   |      |      |
| TT                                | 960  | 32.6 |
| CT                                | 1418 | 48.2 |
| CC                                | 563  | 19.1 |

---
