# Supplementary material for: Rare and Common Genetic Variants, Smoking, and Body Mass Index: Progression and Earlier Age of Developing Advanced Age-Related Macular Degeneration
Source: PubMed Central journal article supplement — Invest Ophthalmol Vis Sci. 2020 Dec 28;61(14):32. doi: 10.1167/iovs.61.14.32 (PMC7774056; doi:10.1167/iovs.61.14.32), 2020-12-28
Supplement: iovs-61-14-32_s005.pdf [file iovs-61-14-32_s005.pdf]

**Supplementary Table S2.** Full risk model for progression to advanced age-related macular degeneration (AMD), geographic atrophy (GA) and neovascular disease (NV)

|                                | Advanced AMD<br>(948/5421 eyes) |         | GA<br>(487/5421 eyes) |         | NV<br>(495/5421 eyes) |         |
|--------------------------------|---------------------------------|---------|-----------------------|---------|-----------------------|---------|
|                                | ESTIMATES (±SE)*                | P value | ESTIMATES (±SE)*      | P value | ESTIMATES (±SE)*      | P value |
| <b>Demographic</b>             |                                 |         |                       |         |                       |         |
| male                           | 0.03 (±0.08)                    | 0.69    | 0.19 (±0.11)          | 0.068   | -0.15 (±0.11)         | 0.15    |
| white                          | 0.68 (±0.36)                    | 0.06    | 1.99 (±1.03)          | 0.053   | 0.17 (±0.41)          | 0.67    |
| > high school                  | -0.04 (±0.07)                   | 0.61    | 0.07 (±0.11)          | 0.53    | -0.15 (±0.11)         | 0.17    |
| <b>Behavioral</b>              |                                 |         |                       |         |                       |         |
| Current smoker                 | 0.96 (±0.13)                    | <0.001  | 0.74 (±0.2)           | 0.0002  | 0.98 (±0.19)          | <0.001  |
| Past smoker                    | 0.14 (±0.08)                    | 0.088   | 0.06 (±0.11)          | 0.61    | 0.28 (±0.11)          | 0.011   |
| BMI 25-29                      | 0.15 (±0.09)                    | 0.078   | 0.14 (±0.12)          | 0.26    | 0.19 (±0.12)          | 0.14    |
| BMI ≥30                        | 0.28 (±0.1)                     | 0.003   | 0.25 (±0.14)          | 0.06    | 0.32 (±0.14)          | 0.018   |
| <b>Baseline Severity Scale</b> |                                 |         |                       |         |                       |         |
| 1                              |                                 |         |                       |         |                       |         |
| 2                              | 1.46 (±0.3)                     | <0.001  | 2.39 (±0.65)          | 0.0002  | 1.08 (±0.34)          | 0.002   |
| 3                              | 1.77 (±0.32)                    | <0.001  | 2.66 (±0.62)          | <0.001  | 1.46 (±0.36)          | <0.001  |
| 4                              | 2.60 (±0.25)                    | <0.001  | 3.29 (±0.62)          | <0.001  | 2.32 (±0.29)          | <0.001  |
| 5                              | 3.26 (±0.26)                    | <0.001  | 4.21 (±0.6)           | <0.001  | 2.88 (±0.28)          | <0.001  |
| 6                              | 3.69 (±0.25)                    | <0.001  | 4.70 (±0.6)           | <0.001  | 3.27 (±0.28)          | <0.001  |
| 7                              | 4.31 (±0.25)                    | <0.001  | 5.73 (±0.59)          | <0.001  | 3.27 (±0.28)          | <0.001  |
| 8                              | 4.63 (±0.25)                    | <0.001  | 6.14 (±0.59)          | <0.001  | 3.37 (±0.3)           | <0.001  |
| <b>Genetic variants</b>        |                                 |         |                       |         |                       |         |
| <b>Complement pathway</b>      |                                 |         |                       |         |                       |         |
| <i>CFH</i> Y402H: rs1061170    |                                 |         |                       |         | 0.27 (±0.07)          | <0.001  |
| <i>CFH</i> : rs1410996         | 0.29 (±0.07)                    | <0.001  | 0.29 (±0.1)           | 0.003   |                       |         |
| <i>CFH</i> R1210C: rs121913059 | 1.08 (±0.26)                    | <0.001  | 0.91 (±0.44)          | 0.037   | 1.04 (±0.3)           | <0.001  |

|                                    |               |        |              |        |               |        |
|------------------------------------|---------------|--------|--------------|--------|---------------|--------|
| <i>C3</i> R102G: rs2230199         | 0.15 (±0.06)  | 0.007  |              |        | 0.17 (±0.08)  | 0.033  |
| <i>C3</i> K155Q: rs147859257       | 0.70 (±0.16)  | <0.001 | 0.83 (±0.19) | <0.001 |               |        |
| <b>Angiogenesis pathway</b>        |               |        |              |        |               |        |
| <i>TGFBR1</i> : rs334353           |               |        |              |        | -0.18 (±0.09) | 0.044  |
| <b>Immune/inflammatory pathway</b> |               |        |              |        |               |        |
| <i>ARMS2/HTRA1</i> : rs10490924    | 0.36 (±0.05)  | <0.001 | 0.22 (±0.07) | 0.002  | 0.50 (±0.07)  | <0.001 |
| <i>TNFRSF10A</i> : rs13278062      |               |        |              |        | -0.13 (±0.07) | 0.066  |
| <b>Extracellular matrix</b>        |               |        |              |        |               |        |
| <i>COL8A1</i> : rs13095226         | 0.17 (±0.08)  | 0.023  | 0.24 (±0.11) | 0.028  |               |        |
| <b>DNA repair/protein binding</b>  |               |        |              |        |               |        |
| <i>RAD51B</i> : rs8017304          | -0.20 (±0.06) | <0.001 |              |        | -0.27 (±0.08) | <0.001 |
| <i>HSPH1/B3GALTL</i> : rs9542236   | 0.12 (±0.05)  | 0.019  |              |        | 0.15 (±0.07)  | 0.038  |

---

\* Estimates were calculated for time to progression using age as the time scale with eyes as the unit of analysis, adjusted for sex, race, education, smoking history, BMI, AMD baseline eye-specific severity scale, AREDS treatment, and the genetic variants associated with the respective outcome.

---
